# Supplementary material for: Photoaccelerated oxidation of chlorinated phenols
Source: Royal Society of Chemistry journal article supplement (doi:10.1039/b301705b), 2003-01-01
Supplement: b301705b.doc [file b301705b.doc]

Supplementary information for

# Photoaccelerated oxidation of chlorinated phenols

Gábor Lente*a* and James H. Espenson**b*

a Department of Inorganic and Analytical Chemistry, University of Debrecen, Debrecen, Hungary. Fax: 36-52-489-667; Tel: 36-52-512-900; E-mail: lenteg@delfin.klte.hu

b Ames Laboratory, Iowa State University, Ames, IA, USA. Fax: 1-515-294-5233; Tel: 1-515-294-5370; E-mail: espenson@ameslab.gov

Experimental information:

Chlorinated phenols purchased from Aldrich and Lancaster Synthesis were purified by vacuum sublimation. The iron complexes used as catalysts were prepared using published methods except iron(III) meso-tetra(4-sulfonatophenyl) porphine chloride, which was purchased from Frontier Scientific (www.porphyrin.com).

Shimadzu UV-2501PC (scanning), UV-3101PC (scanning), MultiSpec-1500 (diode-array) spectrophotometers and a Shimadzu TOC-5000A total organic carbon analyzer were used in this study. NMR spectra were recorded on a Varian VRX-300 and a Bruker DRX-400 instrument. NMR spectra were calibrated using the residual signal of the solvent. A Weiss Research CL3005 combination chloride ion selective electrode and a Hanna Instruments HI 1131 combination pH electrode were used attached to a Hanna Instruments pH302 pH-meter. The electrodes were calibrated every day using standard NaCl solutions and standard buffers, respectively. The response function of the chloride ion selective electrode showed a very reproducible curvature at low chloride ion concentrations. Our observations on this curvature were in excellent agreement with the specifications provided by the manufacturer of the electrode, and a parabolic calibration was used in the nonlinear region. Kinetic experiments with the chloride ion selective electrode were always carried out with a small amount of NaCl added prior to the experiment (referred to as [Cl-]0 in the figure captions or figures) in order to avoid badly defined voltage readings at the beginning of the curves. The lamp used in this study was a commercially available Regent 500 Watt Halogen Worklight (Regent Lightning Corporation, Burlington, NC, USA). The spectral properties of the lamp were recorded by directing its light beam to the detector of a diode-array spectrophotometer.

**Fig. S1** Spectral changes in the reaction of TCP with H2O2 in the absence of a catalyst. **a**: freshly prepared reaction mixture; **b**: after 6 days in the dark; **c**: after 18 days in the dark; **d**: after 6 days in room light; **e**: after 18 days in room light. [TCP] = 1.95 mM; [H2O2] = 90 mM; *T* = 25.0°C; 1 mm cell.

**Fig. S2** Spectral characteristics of the halogen worklight used in this study.

**Fig. S3** Calibration curve for the chloride ion selective electrode. ** = 0.1 M (NaNO3); *T* = 25.0°C.

**Fig. S4** Effect of light on the oxidation of TCP by H2O2 catalyzed by hexaaquairon(III). [Fe(III)] = 0.18 mM; [TCP] = 1.51 mM; [Cl-]0 = 5.0 M; [H2O2] = 97 mM; ** = 0.1 M (NaNO3); *T* = 25.0°C.

**Fig. S5** Effect of light on the oxidation of TCP by H2O2 catalyzed by iron tetrasulfophthalocyanine. [catalyst] = 7.0 M; [TCP] = 1.51 mM; [Cl-]0 = 0.10 mM; [H2O2] = 97 mM; ** = 0.1 M (NaNO3); *T* = 25.0°C.

**Fig. S6** Effect of light on the oxidation of TCP by H2O2 catalyzed by Fe(TPA)2+. [Fe(TPA)2+] = 0.11 mM; [TCP] = 1.61 mM; [Cl-]0 = 5.0 M; [H2O2] = 97 mM; ** = 0.1 M (NaNO3); *T* = 25.0°C.

**Fig. S7** Effect of light on the oxidation of TCP by H2O2 catalyzed by *cis*-Fe(cyclam)3+. [*cis*-Fe(cyclam)3+] = 0.13 mM; [TCP] = 1.61 mM; [Cl-]0 = 0.57 mM; [H2O2] = 97 mM; ** = 0.1 M (NaNO3); *T* = 25.0°C.

**Fig. S8** Effect of light on the oxidation of 2,6-dichlorophenol by H2O2 catalyzed by Fe(TPPS)+. [Fe(TPPS)+] = 2.9 M; [2,6-dichlorophenol] = 0.85 mM; [Cl-]0 = 0.048 mM; [H2O2] = 46 mM; ** = 0.1 M (NaNO3); *T* = 25.0°C.

**Fig. S9** Effect of light on the oxidation of 2,4-dichlorophenol by H2O2 catalyzed by Fe(TPPS)+. [Fe(TPPS)+] = 3.1 M; [2,4-dichlorophenol] = 1.34 mM; [Cl-]0 = 0.1 mM; [H2O2] = 97 mM; ** = 0.1 M (NaNO3); *T* = 25.0°C.

**Fig. S10** Effect of light on the oxidation of 2,4,5-trichlorophenol by H2O2 catalyzed by Fe(TPPS)+. [Fe(TPPS)+] = 2.9 M; [2,4,5-trichlorophenol] = 0.73 mM; [Cl-]0 = 0.20 mM; [H2O2] = 46 mM; ** = 0.1 M (NaNO3); *T* = 25.0°C.

**Fig. S11** Effect of light on the oxidation of 2,3,4,6-tetrachlorophenol by H2O2 catalyzed by Fe(TPPS)+. [Fe(TPPS)+] = 2.9 M; [2,3,4,6-tetrachlorophenol] = 0.32 mM; [Cl-]0 = 0.12 mM; [H2O2] = 46 mM; ** = 0.1 M (NaNO3); *T* = 25.0°C.

**Fig. S12** Effect of light on the oxidation of 2,6-dichloro-1,4-benzoquinone by H2O2 catalyzed by Fe(TPPS)+. [Fe(TPPS)+] = 3.1 M; [2,6-dichloro-1,4-benzoquinone] = 0.34 mM; [Cl-]0 = 20 M; [H2O2] = 97 mM; ** = 0.1 M (NaNO3); *T* = 25.0°C.

**Fig. S13** Effect of light on the oxidation of 2,6-dichlorohydroquinone by H2O2 catalyzed by Fe(TPPS)+. [Fe(TPPS)+] = 3.1 M; [2,6-dichlorohydroquinone] = 1.61 mM; [Cl-]0 = 20 M; [H2O2] = 97 mM; ** = 0.1 M (NaNO3); *T* = 25.0°C.

**Fig. S14** Uv-vis spectral changes in the aqueous photoreaction of 2,6-dichloro-1,4-benzoquinone. **a**: freshly prepared solution, **b**: after 70 minutes in the dark, **c**: after 65 minutes in room light; **d**: after 61 minutes of illumination. [2,6-dichloro-1,4-benzoquinone] = 2.2 mM; *T* = 25.0°C; 1 cm cell.

**Fig. S15** Effect of light on the oxidation of TCP by KHSO5 catalyzed by Fe(TPPS)+. [Fe(TPPS)+] = 3.1 M; [TCP] = 1.80 mM; [Cl-]0 = 50 M; [KHSO5] = 101 mM; ** = 0.28 M (KHSO5/KHSO4/K2SO4); *T* = 25.0°C. The decreasing part between 5 min and 15 min most likely corresponds to some oxidation of Cl- by HSO5-, which is known to be a thermodynamically allowed reaction.
